# Supplementary material for: Survey on Phthalates in Beer Packaged in Aluminum Cans, PET and Glass Bottles
Source: MDPI journal article supplement (doi:10.3390/fermentation9020125), 2023-01-28

**Figure S1. (a–f) The calibration curves for each phthalate.**

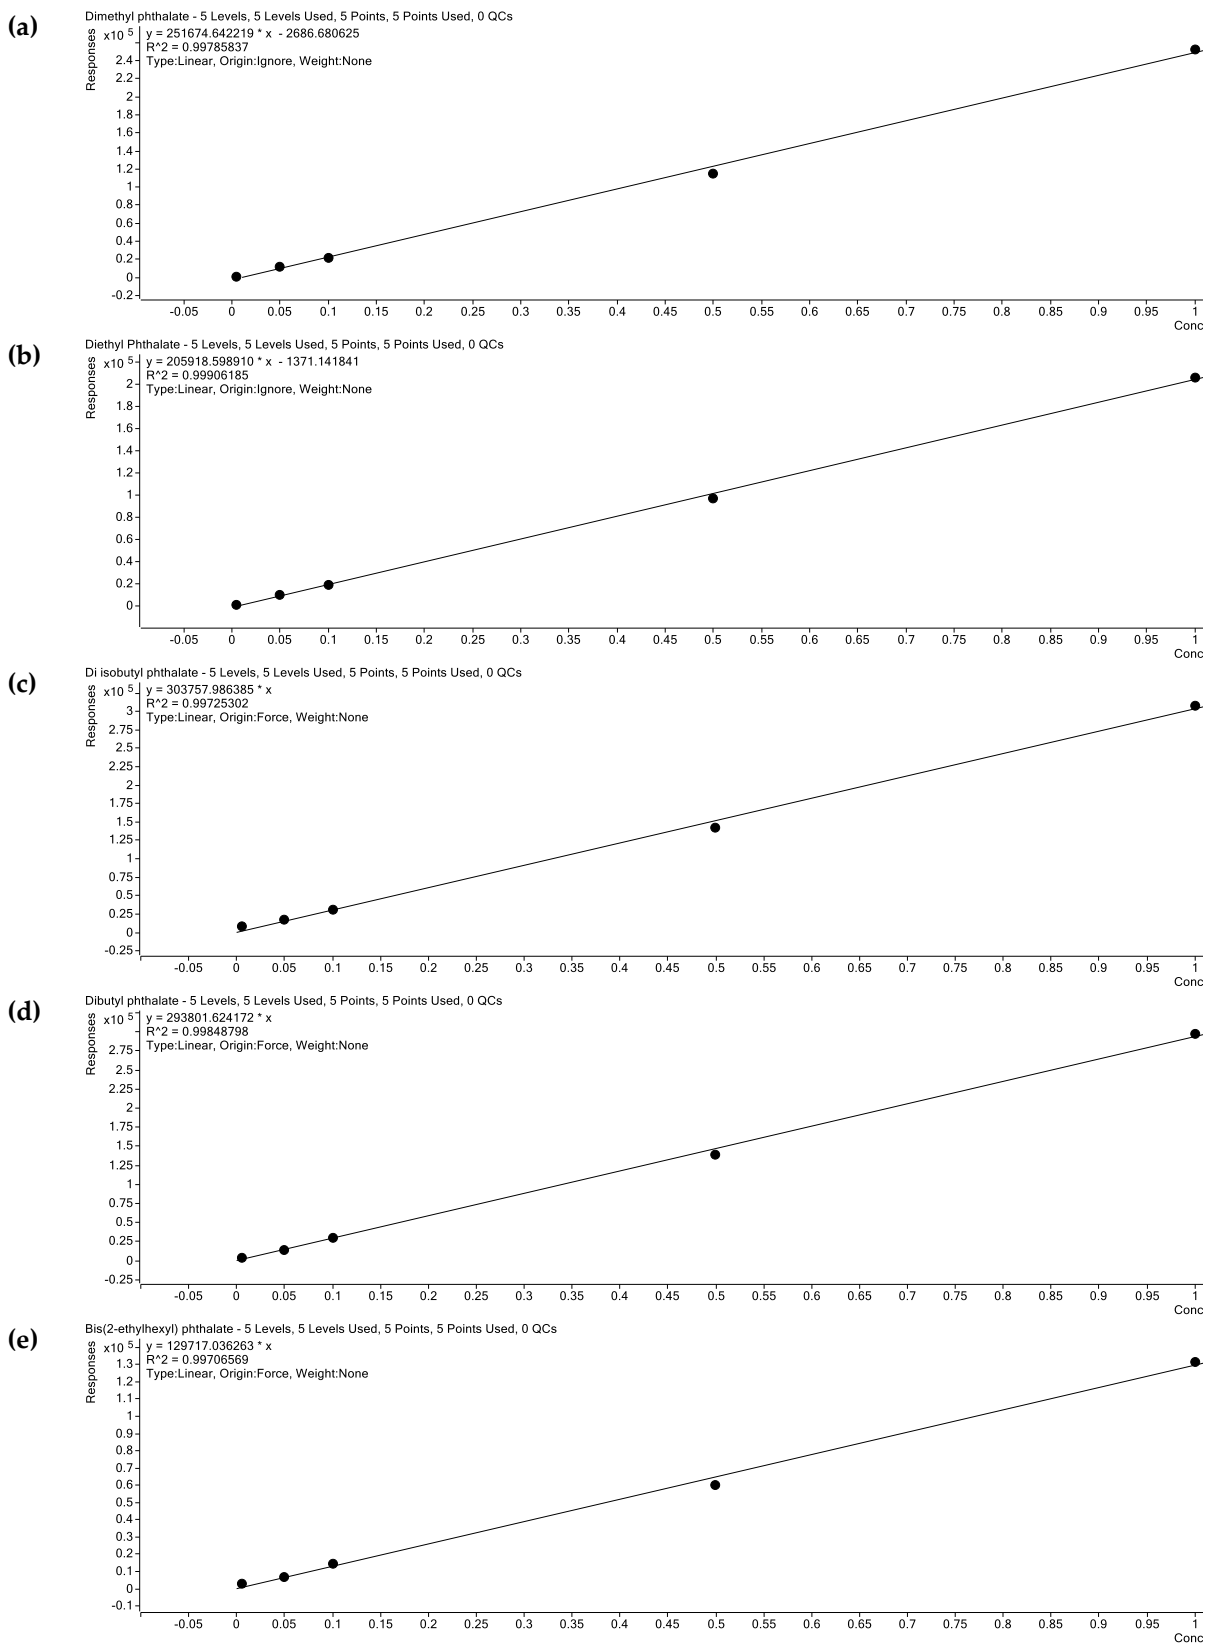

(f)

Di n-octyl phthalate - 5 Levels, 5 Levels Used, 5 Points, 5 Points Used, 0 QCs  
x10<sup>5</sup> |  $y = 227418.791400 \cdot x$   
 $R^2 = 0.99954089$   
Type: Linear, Origin: Force, Weight: None

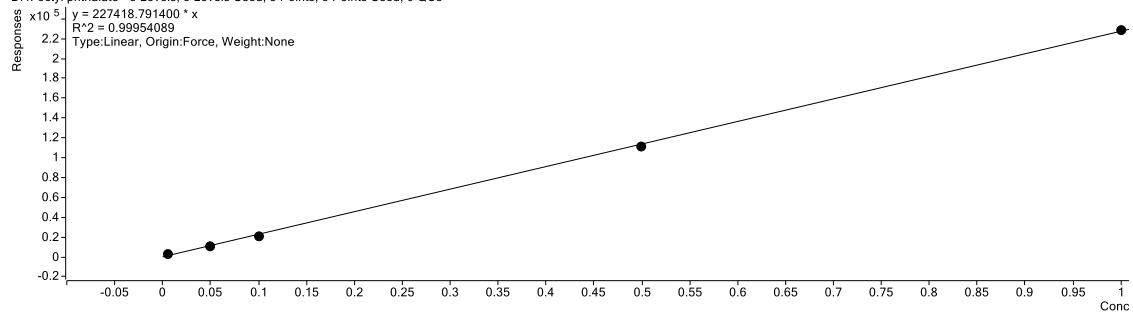

Supplement: s1 [file s1]
